# Supplementary material for: Chestnut-like copper cobalt phosphide catalyst for all-pH hydrogen evolution reaction and alkaline water electrolysis
Source: Royal Society of Chemistry journal article supplement (doi:10.1039/c9ta03686e), 2019-01-01
Supplement: c9ta03686e2.pdf [file c9ta03686e2.pdf]

## Supporting Information

### Chestnut-like Copper Cobalt Phosphide Catalyst for All-pH Hydrogen Evolution Reaction and Alkaline Water Electrolysis

Liang Yan<sup>a</sup>, Bing Zhang<sup>a</sup>, Junlu Zhu<sup>a</sup>, Shanzhi Zhao<sup>a</sup>, Yunyong Li<sup>a,\*</sup>, Bao Zhang<sup>b</sup>,  
Jianjun Jiang<sup>b</sup>, Xiao Ji<sup>b</sup>, Haiyan Zhang<sup>a</sup>, and Pei Kang Shen<sup>c</sup>

<sup>a</sup> *Guangdong Provincial Key Laboratory of Functional Soft Condensed Matter, School of Materials and Energy, Guangdong University of Technology, No. 100 Waihuan Xi Road, Guangzhou Higher Education Mega Center, Guangzhou, 510006, China*

*E-mail: yyli@gdut.edu.cn (Y.Y. Li).*

<sup>b</sup> *School of Optical and Electronic Information, Huazhong university of science and technology, Wuhan, 430074, China*

<sup>c</sup> *Collaborative Innovation Center of Sustainable Energy Materials, Guangxi University, Nanning, Guangxi, 530004, China*

## Experimental section

**Chemicals.** All the chemicals were directly used as received without further purification. Cobalt (II) acetate tetrahydrate ( $\text{Co}(\text{CH}_3\text{COO})_2 \cdot 4\text{H}_2\text{O}$ ), Copper nitrate trihydrate ( $\text{Cu}(\text{NO}_3)_2 \cdot 3\text{H}_2\text{O}$ ),  $\text{NH}_4\text{F}$ , urea and  $\text{NaH}_2\text{PO}_2 \cdot \text{H}_2\text{O}$  were purchased from Aladdin Chemical Reagent Co., Ltd. Pt/C (20% Pt on Vulcan XC-72R) and iridium oxide nanoparticles ( $\text{IrO}_2$ ) were purchased from Sigma-Aldrich Chemical Reagent Co., Ltd. Nafion solution (5%) was purchased from Dupont Co., Ltd. Carbon fiber paper (TGP-H-060, thickness: 0.19 mm, electrical resistivity in through plane is  $80 \text{ m}\Omega \text{ cm}$  and in plane is  $5.8 \text{ m}\Omega \text{ cm}$ ). Highly purified  $\text{N}_2$  were supplied by Guang Zhou Sheng Ying Gas Co., Ltd. Ultrapure water (resistivity:  $\rho \geq 18 \text{ M}\Omega \text{ cm}^{-1}$ ) was used to prepare the solutions.

## Electrodes preparation.

*Synthesis of  $\text{Cu}_x\text{Co}_{1-x}(\text{OH})\text{F}/\text{CP}$  precursors and  $\text{Cu}_x\text{Co}_{1-x}\text{P}/\text{CP}$  electrodes:* The  $\text{Cu}_x\text{Co}_{1-x}(\text{OH})\text{F}/\text{CP}$  ( $x = 0, 0.025, 0.05, 0.075$  and  $0.1$ ) precursors were prepared by simple hydrothermal method. In a typical synthesis,  $\text{Co}(\text{CH}_3\text{COO})_2 \cdot 4\text{H}_2\text{O}$  and  $\text{Cu}(\text{NO}_3)_2 \cdot 3\text{H}_2\text{O}$  were weighed in the stoichiometric amounts, keeping the total molar mass 2 mmol. Then,  $\text{Co}(\text{CH}_3\text{COO})_2 \cdot 4\text{H}_2\text{O}$ ,  $\text{Cu}(\text{NO}_3)_2 \cdot 3\text{H}_2\text{O}$ , 4 mmol  $\text{NH}_4\text{F}$ , and 8 mmol urea were dissolved in 40 ml of distilled water, and the mixture was stirred 30 min to form a uniform solution. Then, the above solution was transferred to a 50 ml Teflon-lined stainless steel autoclave containing the CP ( $2 \times 2.5 \text{ cm}^2$ ). Before being used, the CP was sequentially cleaned with diluted  $\text{HNO}_3$  (1 M), ethanol and deionized water to remove the surface impurity. Subsequently, it was sealed and

maintained at 120 °C for 6 h in an electric oven. After the autoclave naturally cooled to room temperature, the  $\text{Cu}_x\text{Co}_{1-x}(\text{OH})\text{F}/\text{CP}$  was taken out, washed with ethanol and water thoroughly, and dried at 60 °C for overnight.

The  $\text{Cu}_x\text{Co}_{1-x}\text{P}/\text{CP}$  electrodes were prepared by a low-temperature phosphidation process. To prepare  $\text{Cu}_x\text{Co}_{1-x}\text{P}/\text{CP}$ ,  $\text{Cu}_x\text{Co}_{1-x}(\text{OH})\text{F}/\text{CP}$  and  $\text{NaH}_2\text{PO}_2 \cdot \text{H}_2\text{O}$  were placed at two separate positions in one porcelain crucible in the presence of  $\text{NaH}_2\text{PO}_2 \cdot \text{H}_2\text{O}$  at the upstream side of the furnace. The molar ratio of Co to P was 1:10. Subsequently, the samples were heated to 300 °C with a heating rate of 3 °C  $\text{min}^{-1}$  for 2 h under  $\text{N}_2$  atmosphere. After cooling, the loading of  $\text{Cu}_x\text{Co}_{1-x}\text{P}$  on CP was determined by weighing the mass of the CP before and after catalyst growth. The mass loading of  $\text{Cu}_x\text{Co}_{1-x}\text{P}$  on CP was about 5  $\text{mg cm}^{-2}$ .

*Preparation of  $\text{Cu}_3\text{P}/\text{CF}$ ,  $\text{Pt}/\text{C}/\text{CP}$  and  $\text{IrO}_2/\text{CP}$  electrodes:* For comparison,  $\text{Cu}_3\text{P}$  nanowire arrays on copper foam (CF) was synthesized according to reported work.<sup>1</sup> To prepare  $\text{Pt}/\text{C}/\text{CP}$  or  $\text{IrO}_2/\text{CP}$  electrodes, 5 mg of commercial Pt/C or  $\text{IrO}_2$  were dispersed in 950  $\mu\text{L}$  solution of ethanol, then addition of 50  $\mu\text{L}$  5 wt% Nafion solution, followed by ultrasound for at least 30 min to form a homogeneous catalyst ink. Then the catalyst ink was coated onto a CP (1 x 1  $\text{cm}^2$ ) to achieve the sample loading of 5  $\text{mg cm}^{-2}$ .

**Physical characterizations.** The X-ray diffraction (XRD) measurements were performed with a D8 ADVANCE diffractometer using a Cu  $\text{K}_\alpha$  ( $\lambda = 0.15406 \text{ nm}$ ) radiation source (Bruker Co.). X-ray photoelectron spectroscopy (XPS) measurements were carried out by Escalab 250Xi with Al  $\text{K}_\alpha$  radiation source (Thermo Fisher

Scientific Inc.). Scanning electron microscopy (SEM) measurements were performed with a SU8220 field emission scanning electron microscopy (Hitach Co.) equipped with energy dispersive X-ray spectrometry (EDS) with an acceleration voltage of 30 kV. Transmission electron microscopy (TEM), high resolution transmission electron microscopy (HR-TEM) and element mapping analysis were conducted on Talos F200s (FEI Co.) under an accelerating voltage of 200 kV. Raman spectra were collected on a LabRAM HR Evolution Raman spectrometer with 532 nm wavelength incident laser light. Fourier transform infrared spectroscopy (FTIR) was recorded on a Nicolet IS50 spectrometer.

**Electrochemical measurements.** All the electrochemical measurements were performed with PGSTAT302N potentiostat/galvanostat (Metrohm Autolab, Netherlands). A conventional three-electrode glass cell was used, the synthesized  $\text{Cu}_x\text{Co}_{1-x}\text{P/CP}$  was directly used as the working electrode, a graphite plate was used as the counter electrode and a reversible hydrogen electrode (RHE) was used as the reference electrode. Before the HER test, all of the electrolytes (0.5 M  $\text{H}_2\text{SO}_4$ , 1.0 M KOH and 1.0 M PBS) were bubbled with high-purity  $\text{N}_2$  for at least 30 min to remove the dissolved oxygen. For OER test, the electrolyte was saturated by  $\text{O}_2$  for at least 30 min before the measurements. The electrodes were first cycled by 20 cyclic voltammetry (CV) scans at a scan rate of  $100 \text{ mV s}^{-1}$  until it reaches a steady state, the linear sweep voltammetry (LSV) with the scan rate of  $5 \text{ mV s}^{-1}$  was then performed. Stability tests were measured by CV scanning from 0.1 V to -0.4 V for HER (or 1.3 V to 1.8 V for OER) for 1000 cycles with the scan rate of  $100 \text{ mV s}^{-1}$ . The long-term

stability of  $\text{Cu}_x\text{Co}_{1-x}\text{P/CP}$  was assessed through chronopotentiometry, which was conducted with the current density holding at  $10 \text{ mA cm}^{-2}$ . All the tests were corrected for the  $iR$  corrections. Electrochemical impedance spectroscopy (EIS) measurements were measured at potentiostatic mode with 5 mV amplitude in a frequency range from 100 kHz to 0.01 Hz. The overall water splitting test was carried out in a two-electrode system by directly using  $\text{Cu}_x\text{Co}_{1-x}\text{P/CP}$  as both the cathode and anode electrode in 1.0 M KOH electrolyte.

### Computational methods

The DFT calculations<sup>2, 3</sup> are performed by using Vienna Ab-initio Simulation Package (VASP)<sup>4</sup> with Projector Augmented Wave (PAW) method.<sup>5</sup> And the exchange-correlation energy is described by the functional of Perdew, Burke, and Ernzerhof (PBE) form.<sup>6, 7</sup> The kinetic energy cutoff of electron wave functions is 500 eV. The Coulomb and exchange interactions in the pristine and Cu-doped CoP (111) and  $\beta$ -CoOOH (012) systems were described by setting the effective on-site Coulomb and exchange parameters U-J to be 3.4 eV and 4.0 eV for Co and Cu respectively. The geometry optimizations are performed by using the conjugated gradient method, and the convergence threshold is set to be  $10^{-4}$  eV in energy and  $0.01 \text{ eV \AA}^{-1}$  in force. A vacuum layer of 15 Å is applied for all calculated models.

The free energy of hydrogen adsorption at 300 K can be calculated by:

$$\Delta G_H = E_{\text{sur-H}} - 1/2 E_{\text{H}_2} - E_{\text{sur}} + 0.24 \text{ eV}$$

The thermodynamic model of water oxidation proposed by **Norskov** and co-workers,<sup>8</sup> which is composed of four electrochemical steps, each of which

constitutes one proton transfer, were used in this work. The following electron reaction paths are considered for oxygen evolution reaction (OER) process:

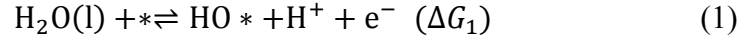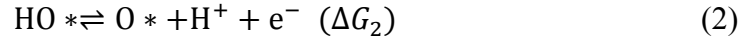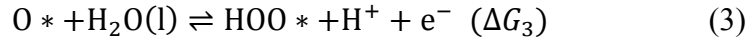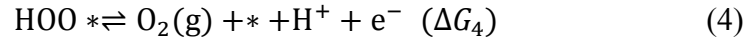

where \* represents an active site on the  $\gamma\text{-Al}_2\text{O}_3$  surface.  $\text{O}^*$ ,  $\text{OH}^*$  and  $\text{OOH}^*$  are intermediates adsorbed on the active site.  $\Delta G_{1-4}$  are the Gibbs free energies change for the above four elementary steps. Zero point energy (ZPE) corrections and thermal enthalpy and entropy contributions (TS) to the free energies are retrieved from literature.<sup>9</sup>

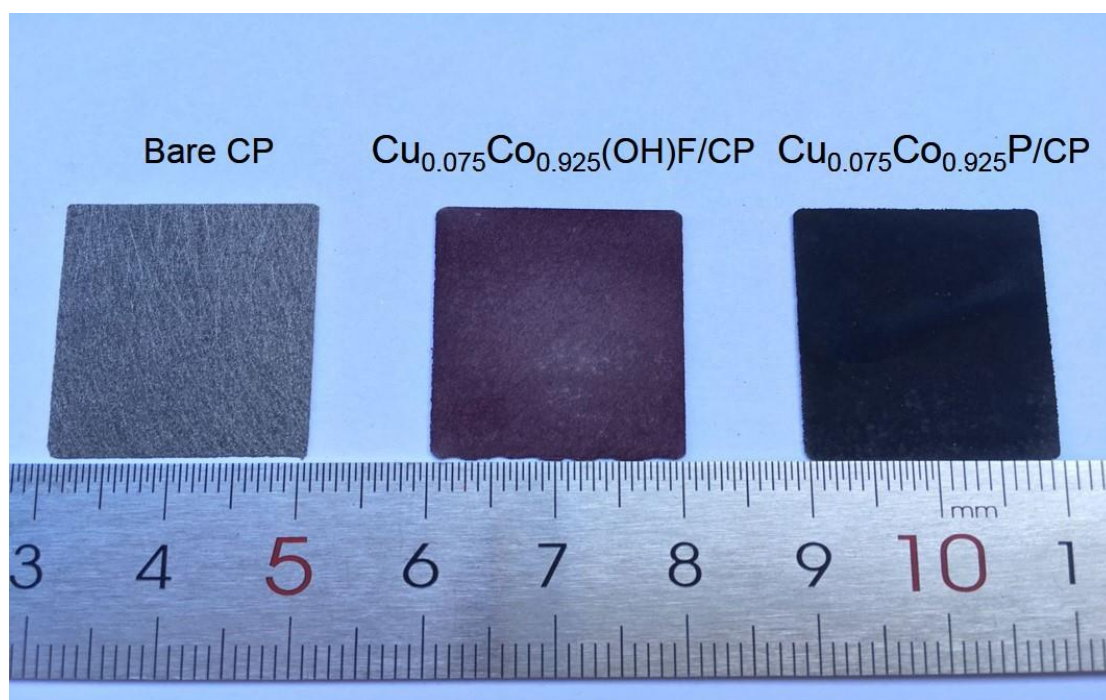

**Figure S1.** Optical photographs of bare CP,  $\text{Cu}_{0.075}\text{Co}_{0.925}(\text{OH})\text{F}/\text{CP}$ , and  $\text{Cu}_{0.075}\text{Co}_{0.925}\text{P}/\text{CP}$ .

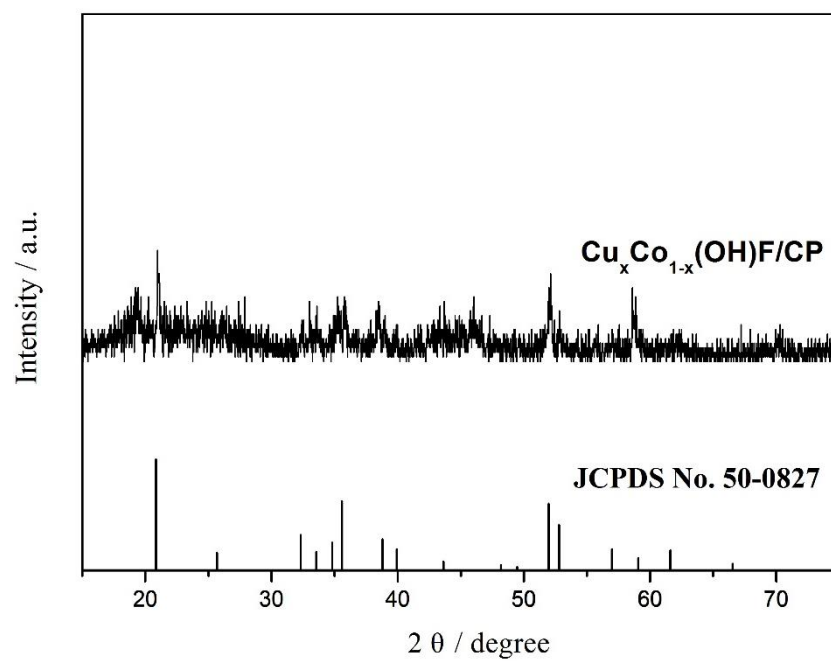

**Figure S2.** XRD pattern of as-prepared  $\text{Cu}_x\text{Co}_{1-x}(\text{OH})\text{F}/\text{CP}$ .

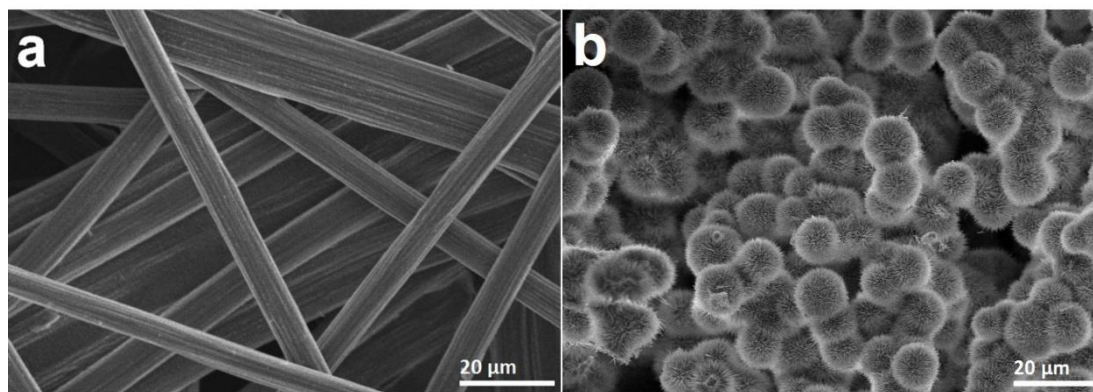

**Figure S3.** SEM images of (a) bare CP and (b)  $\text{Cu}_{0.075}\text{Co}_{0.925}\text{P}/\text{CP}$ .

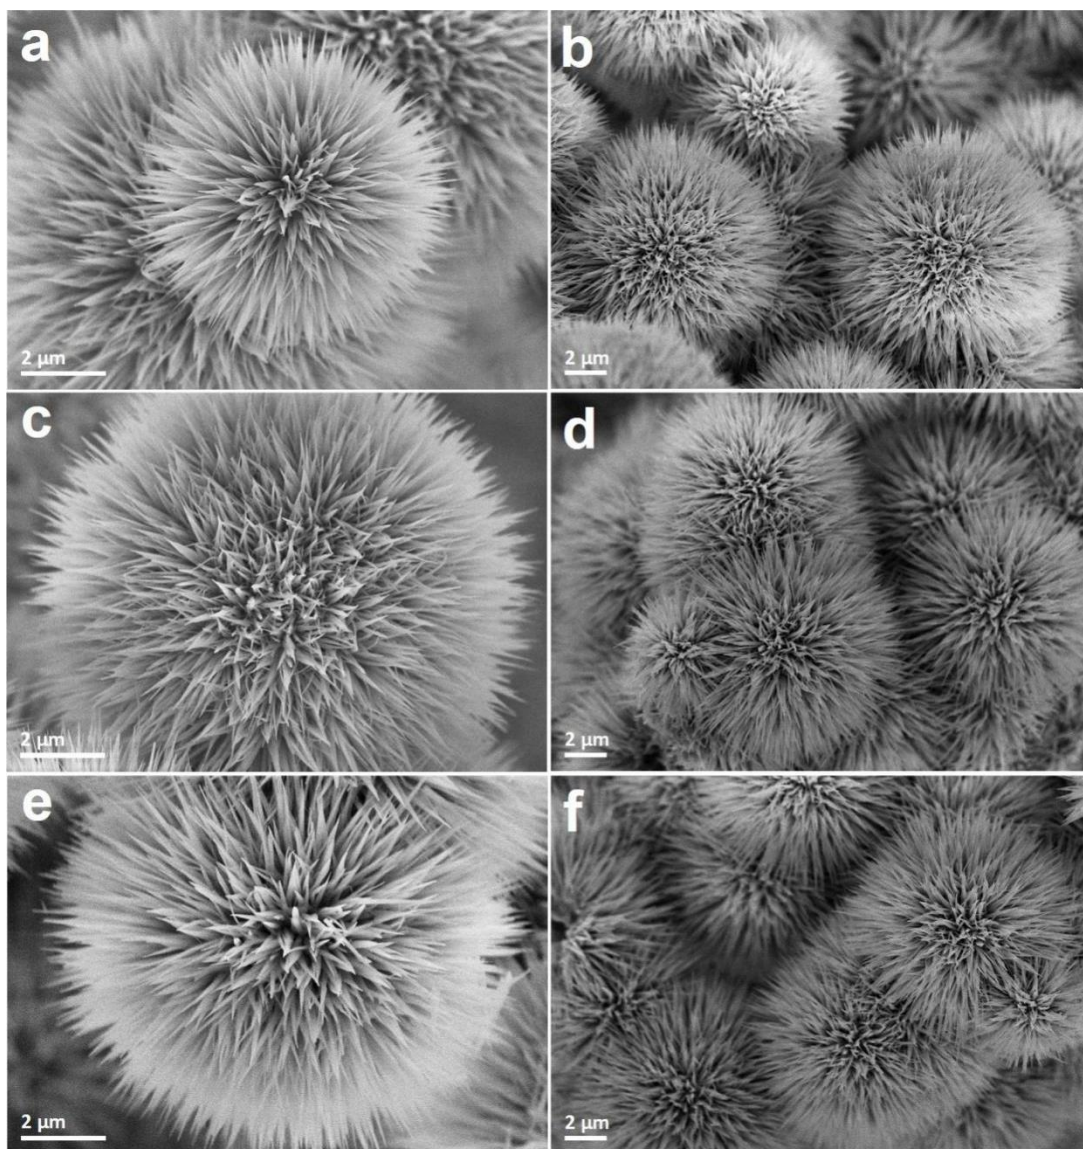

**Figure S4.** SEM images of (a)  $\text{Cu}_{0.025}\text{Co}_{0.975}(\text{OH})\text{F}/\text{CP}$ , (c)  $\text{Cu}_{0.05}\text{Co}_{0.95}(\text{OH})\text{F}/\text{CP}$ , (e)  $\text{Cu}_{0.1}\text{Co}_{0.9}(\text{OH})\text{F}/\text{CP}$  and after the phosphidation of (b)  $\text{Cu}_{0.025}\text{Co}_{0.975}\text{P}/\text{CP}$ , (d)  $\text{Cu}_{0.05}\text{Co}_{0.95}\text{P}/\text{CP}$ , (f)  $\text{Cu}_{0.1}\text{Co}_{0.9}\text{P}/\text{CP}$ .

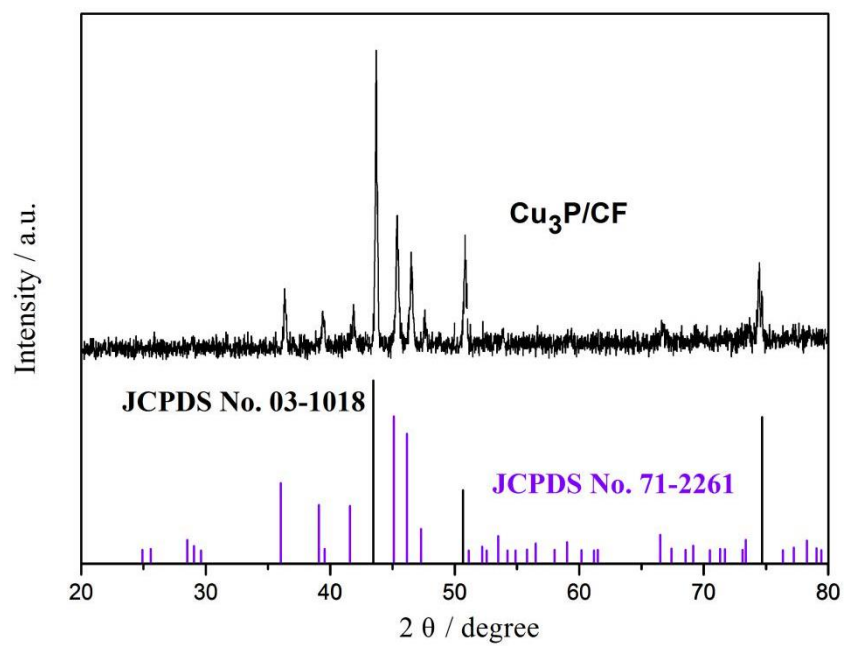

**Figure S5.** XRD pattern of as-prepared  $\text{Cu}_3\text{P}/\text{CF}$ .

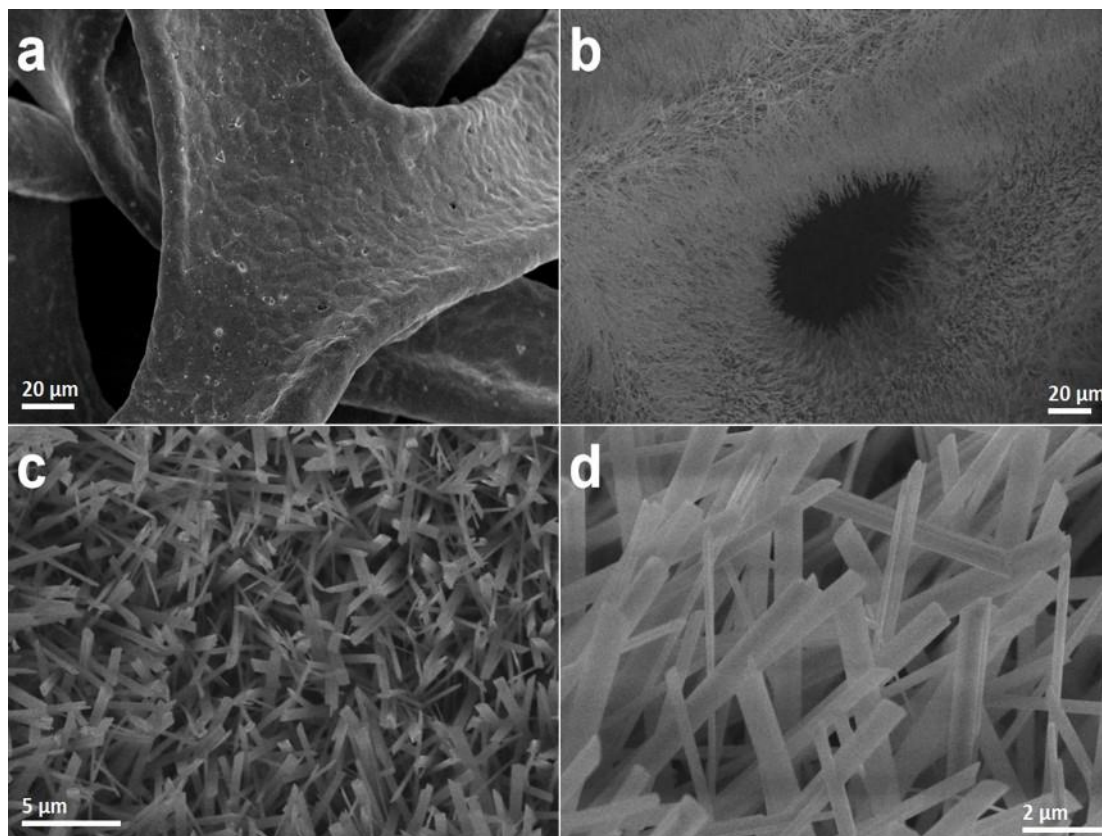

**Figure S6.** SEM images of (a) bare CF and (b-d)  $\text{Cu}_3\text{P}/\text{CF}$  at varied magnifications.

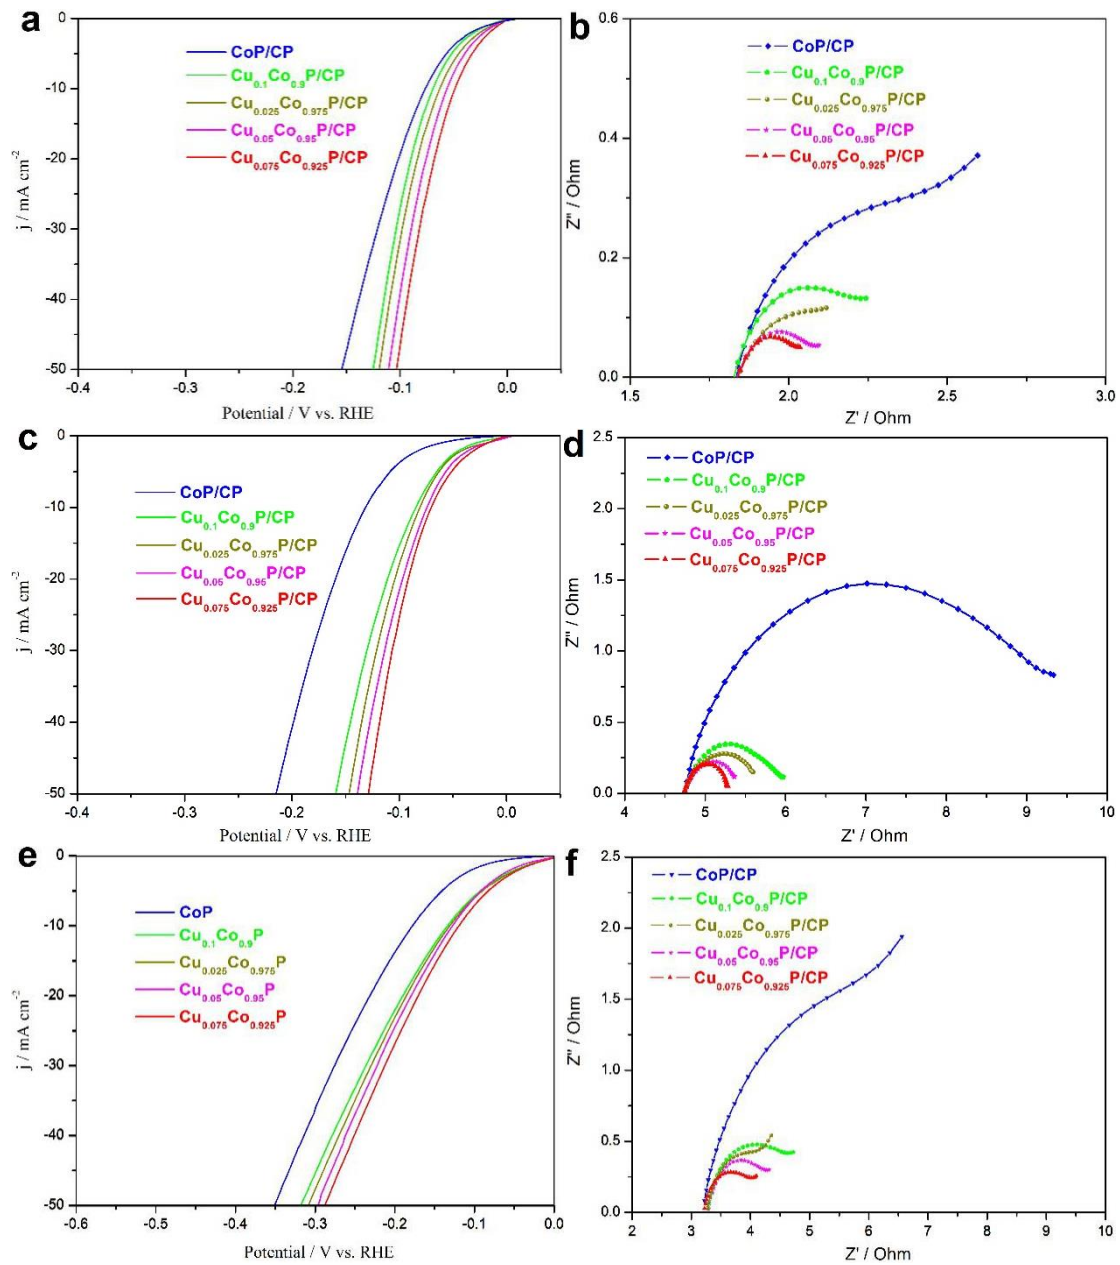

**Figure S7.** HER performances of the  $\text{Cu}_x\text{Co}_{1-x}\text{P/CP}$  ( $x = 0, 0.025, 0.05, 0.075, \text{ and } 0.1$ ) in (a) 0.5 M  $\text{H}_2\text{SO}_4$  (c) 1.0 M KOH, and (e) 1.0 M PBS, respectively. EIS Nyquist plots of the  $\text{Cu}_x\text{Co}_{1-x}\text{P/CP}$  ( $x = 0, 0.025, 0.05, 0.075, \text{ and } 0.1$ ) in (b) 0.5 M  $\text{H}_2\text{SO}_4$ , (d) 1.0 M KOH, and (f) 1.0 M PBS, respectively.

**Electrochemical active surface area (ECSA):** The ECSA of different samples was estimated from the double-layer capacitance ( $C_{dl}$ ), which can be measured using a simple CV method with ten different scan rates (10-100 mV/s) in non-faradaic potential region.<sup>10</sup> In this potential region, all measured currents are assumed to be associated with double-layer charging, which is expected to be linearly proportional to the ECSA. By plotting the capacitive currents  $j = (j_{anodic} - j_{cathodic})/2$  against the scan rates, and following with a linear fit, the  $C_{dl}$  can be determined from the slope. The  $C_{dl}$  can be further converted into ECSA using the specific capacitance value for a standard with 1 cm<sup>2</sup> of real surface area. The ECSA of different samples can be calculated according to the following equation:

$$A_{ECSA}^{Catalysts} = \frac{C_{dl} - catalysts (mF cm^{-2})}{C_{dl} - standard (mF cm^{-2}) \text{ per } cm^2_{ECSA}}$$

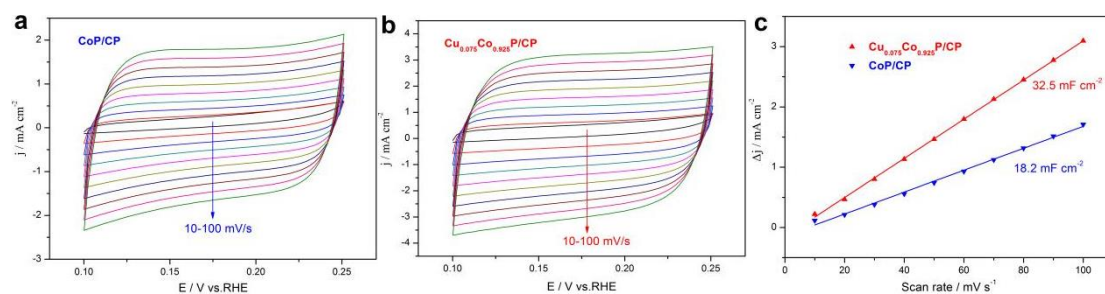

**Figure S8.** CVs for CoP /CP (a) and Cu<sub>0.075</sub>Co<sub>0.925</sub>P/CP (b) at different scan rates in 0.5 M H<sub>2</sub>SO<sub>4</sub>. (c) Linear fitting curves of the capacitive currents as a function of scan rates for CoP /CP and Cu<sub>0.075</sub>Co<sub>0.925</sub>P/CP.

**Turnover frequency (TOF):** To calculate TOF, Cyclic voltammetry measurements was performed in 1.0 M PBS (pH=7) within the potential range of -0.2 to 0.6 V (vs. RHE) at a scan rate of 50 mV s<sup>-1</sup>.<sup>11</sup> When the number of active sites (n) was determined, the TOF was calculated with the equation:

$$\text{TOF} = I/2nF$$

Where I represent the current (A) during the LSV measurement in 0.5 M H<sub>2</sub>SO<sub>4</sub>, F is the Faraday constant (96485 C·mol<sup>-1</sup>), and n is the number of active sites (mol). In the equation, 1/2 represents that two protons to form one hydrogen molecule need two electrons.

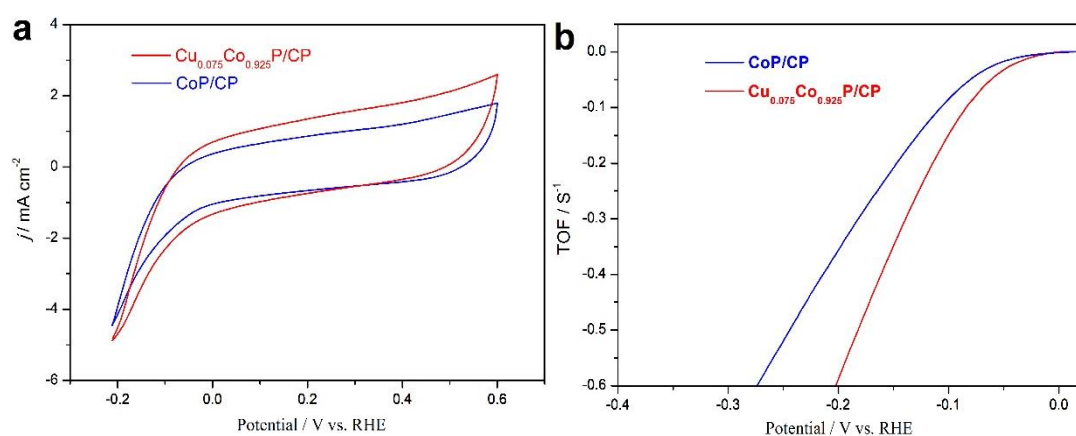

**Figure S9.** (a) CV curves of CoP/CP and Cu<sub>0.075</sub>Co<sub>0.925</sub>P /CP in 1.0 M PBS at a scan rate of 50 mV/s. (b) Calculated TOF of CoP/CP and Cu<sub>0.075</sub>Co<sub>0.925</sub>P /CP in 0.5 M H<sub>2</sub>SO<sub>4</sub>.

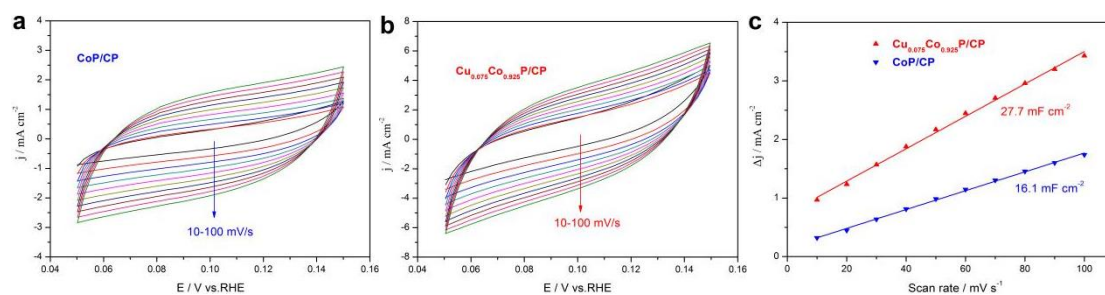

**Figure S10.** CVs for CoP /CP (a) and  $\text{Cu}_{0.075}\text{Co}_{0.925}\text{P/CP}$  (b) at different scan rates in 1.0 M KOH. (c) Linear fitting curves of the capacitive currents as a function of scan rates for CoP /CP and  $\text{Cu}_{0.075}\text{Co}_{0.925}\text{P/CP}$ .

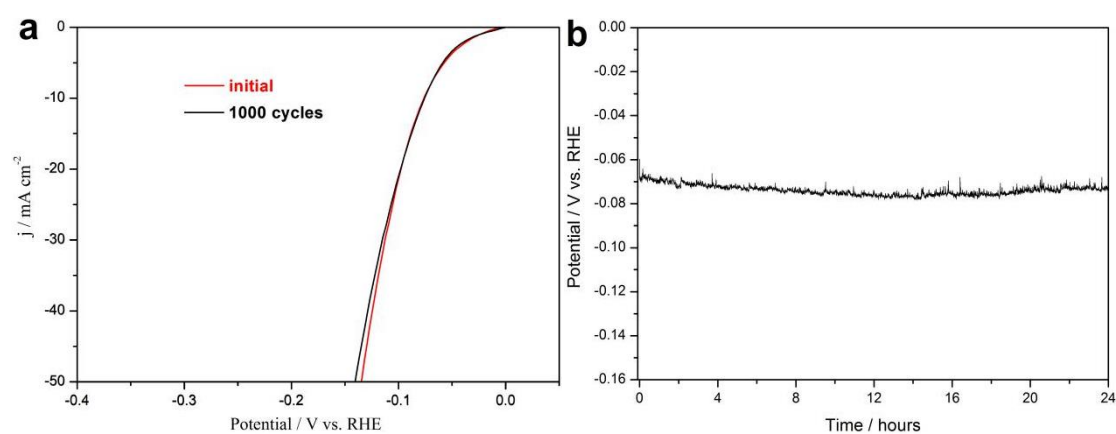

**Figure S11.** Continuous CV curves (a) and chronopotentiometry at  $10 \text{ mA cm}^{-2}$  (b) of  $\text{Cu}_{0.075}\text{Co}_{0.0925}\text{P/CP}$  in 1.0 M KOH.

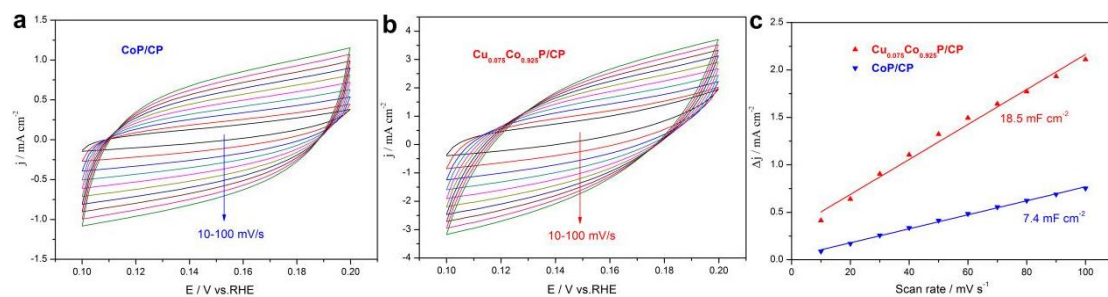

**Figure S12.** CVs for CoP /CP (a) and Cu<sub>0.075</sub>Co<sub>0.925</sub>P/CP (b) at different scan rates in 1.0 M PBS. (c) Linear fitting curves of the capacitive currents as a function of scan rates for CoP /CP and Cu<sub>0.075</sub>Co<sub>0.925</sub>P/CP.

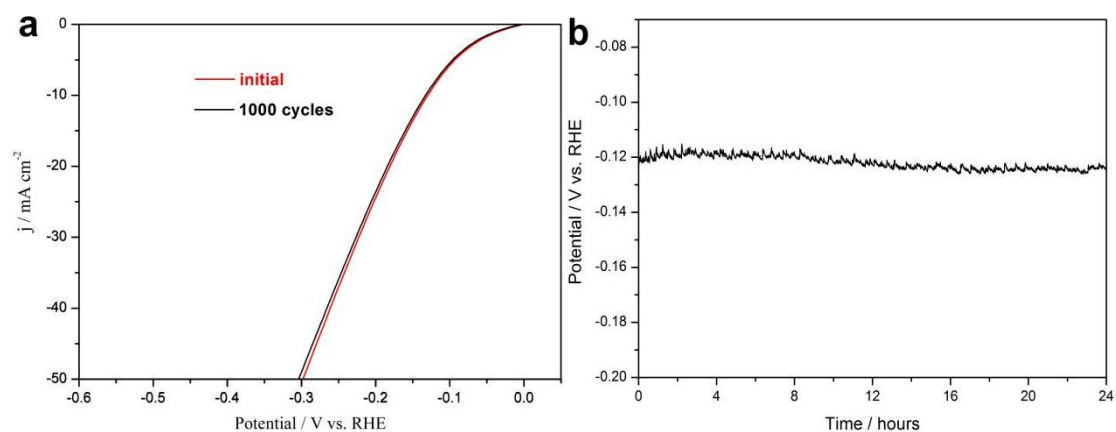

**Figure S13.** Continuous CV curves (a) and chronopotentiometry at 10 mA cm<sup>-2</sup> (b) of Cu<sub>0.075</sub>Co<sub>0.0925</sub>P/CP in 1.0 M PBS.

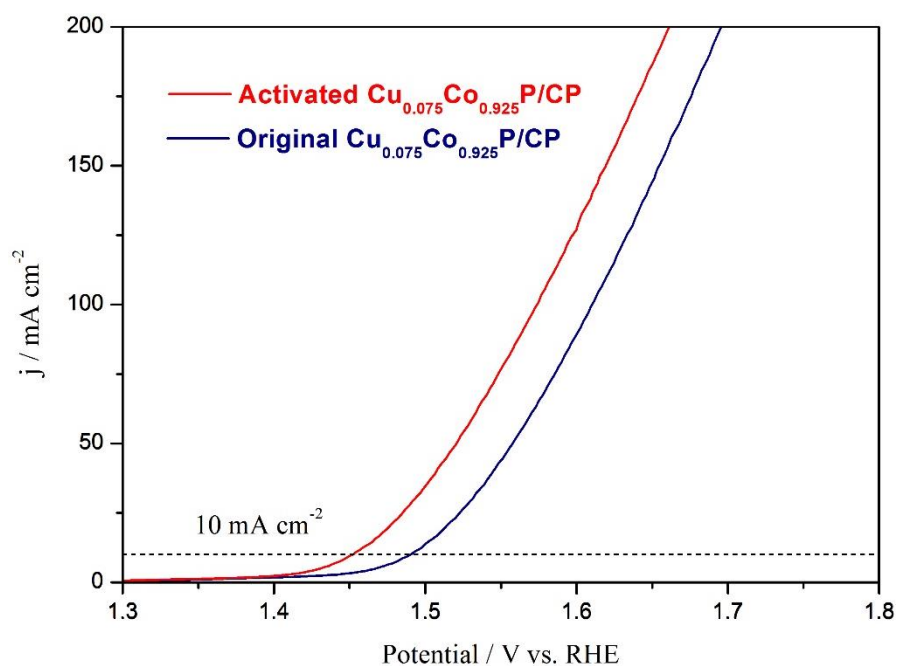

**Figure S14.** OER performances of the  $\text{Cu}_{0.075}\text{Co}_{0.925}\text{P/CP}$  before and after activation.

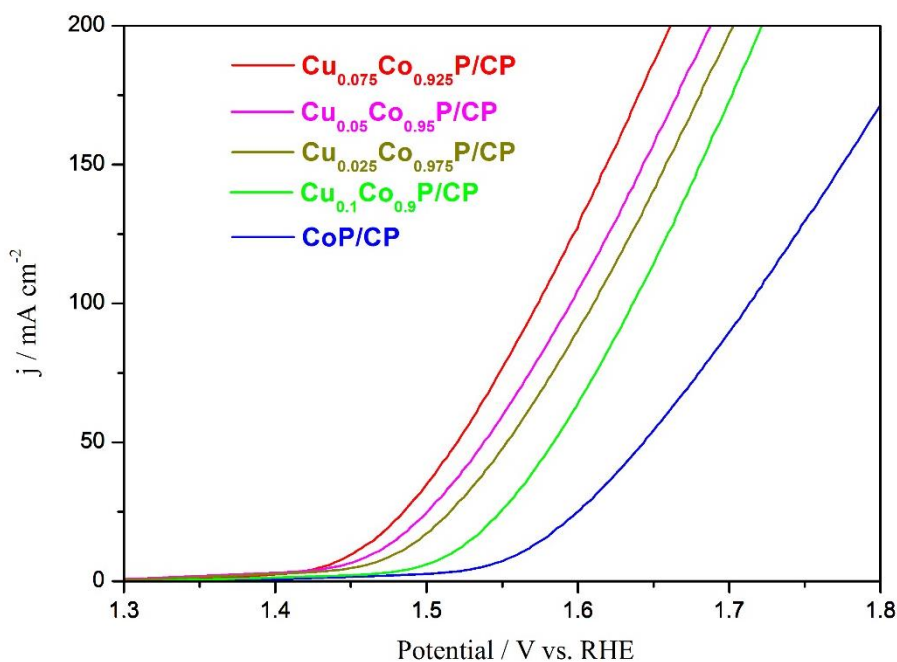

**Figure S15.** OER performances of the  $\text{Cu}_x\text{Co}_{1-x}\text{P/CP}$  ( $x = 0, 0.025, 0.05, 0.075, \text{ and } 0.1$ ) in 1.0 M KOH.

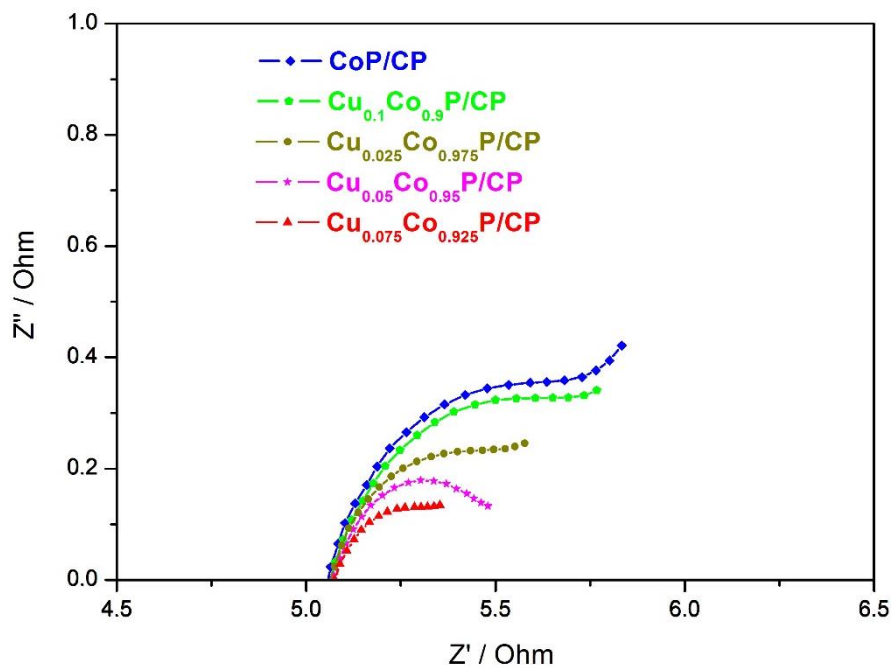

**Figure S16.** EIS Nyquist plots of the Cu<sub>x</sub>Co<sub>1-x</sub>P/CP ( $x = 0, 0.025, 0.05, 0.075$ , and  $0.1$ ) at overpotential of 250 mV in 1.0 M KOH for OER.

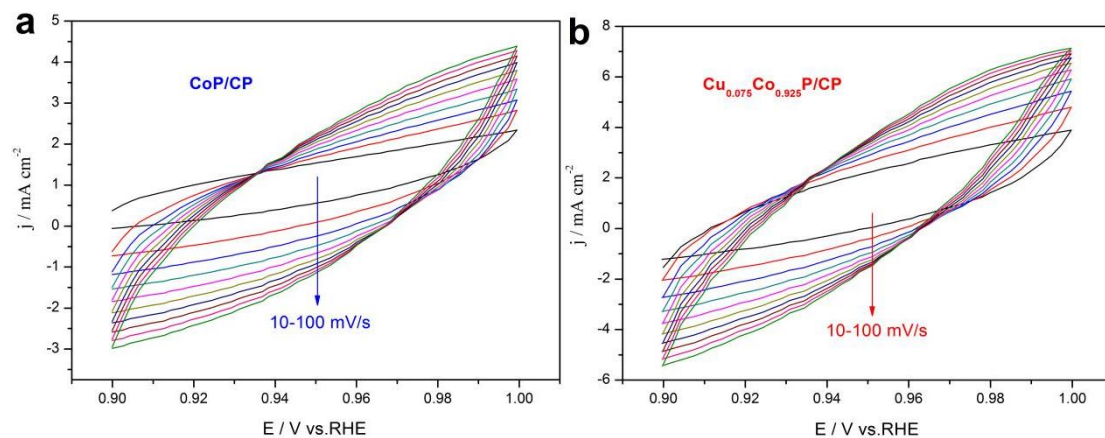

**Figure S17.** CVs for (a) CoP /CP and (b) Cu<sub>0.075</sub>Co<sub>0.925</sub>P/CP at different scan rates in 1.0 M KOH for OER.

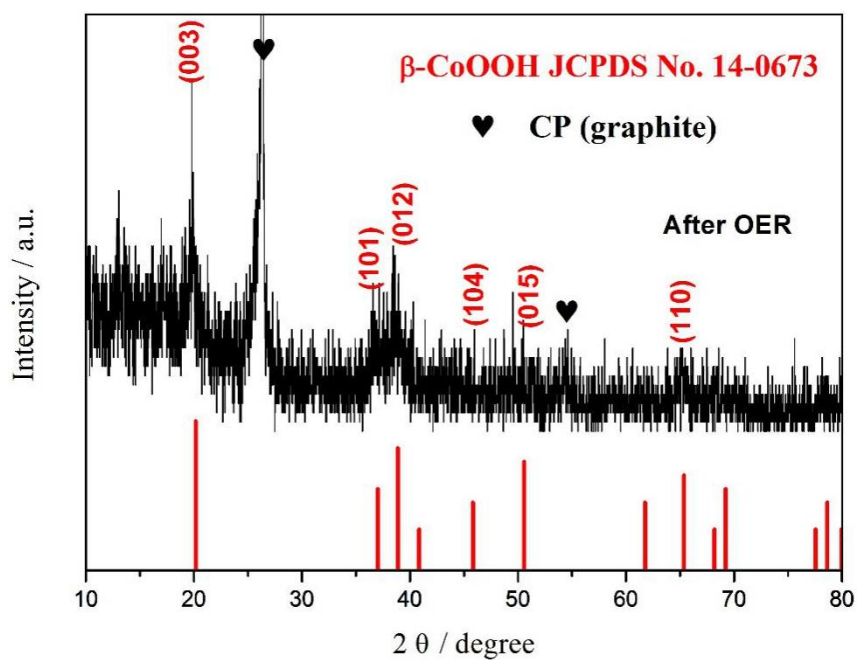

**Figure S18.** XRD pattern of the  $\text{Cu}_{0.075}\text{Co}_{0.925}\text{P}/\text{CP}$  after OER electrolysis.

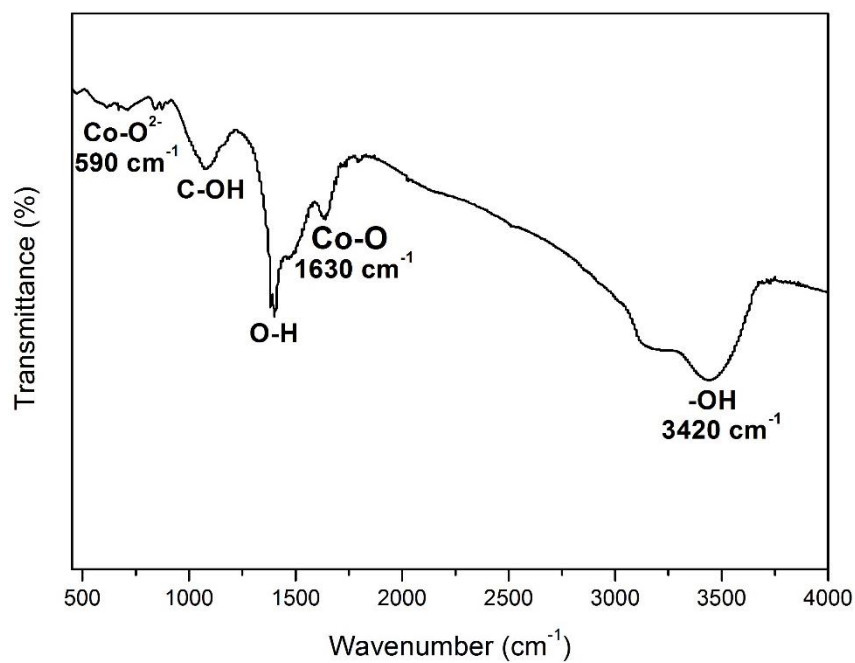

**Figure S19.** FTIR spectrum of the  $\text{Cu}_{0.075}\text{Co}_{0.925}\text{P}/\text{CP}$  after OER electrolysis.

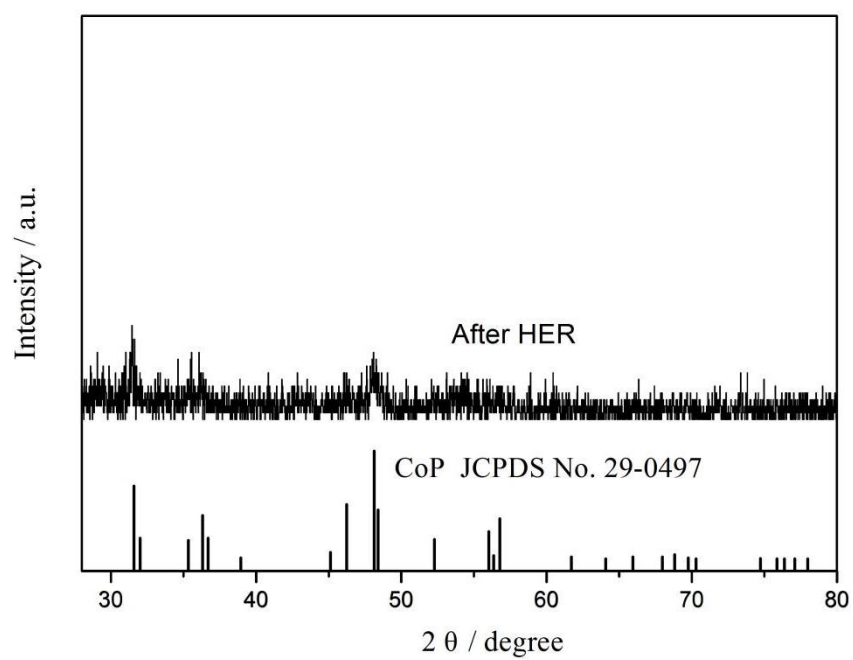

**Figure S20.** XRD pattern of the  $\text{Cu}_{0.075}\text{Co}_{0.925}\text{P/CP}$  after HER electrolysis.

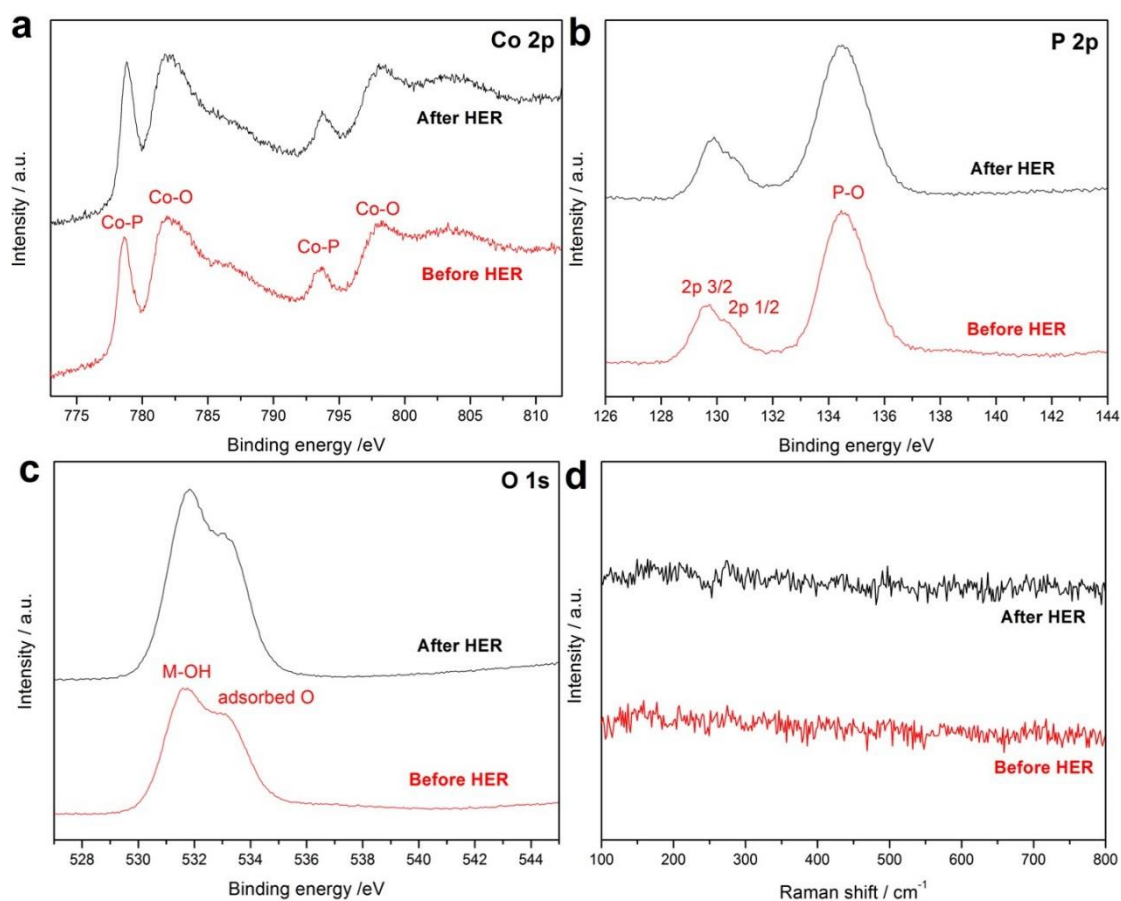

**Figure S21** High-resolution XPS spectra of  $\text{Cu}_{0.075}\text{Co}_{0.0925}\text{P/CP}$  for (a) Co 2p, (b) P 2p, (c) O 1s, and (d) Raman spectra before and after HER tests.

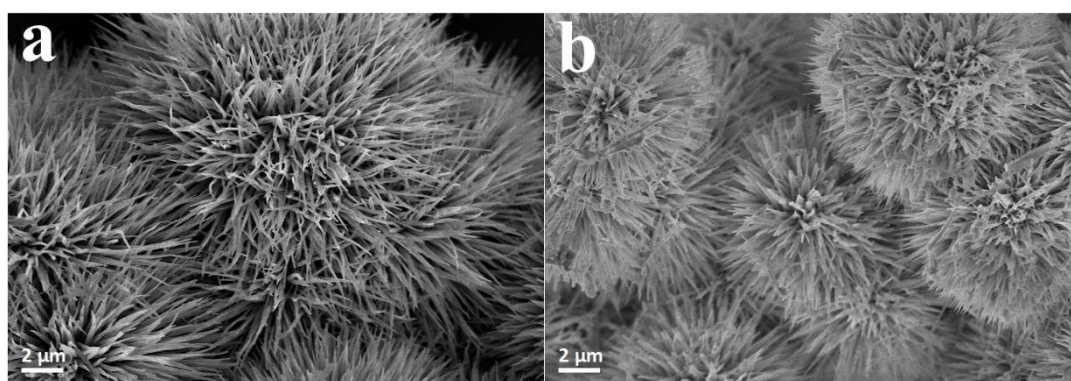

**Figure S22.** SEM images of the  $\text{Cu}_{0.075}\text{Co}_{0.0925}\text{P/CP}$  after (a) HER and (b) OER test.

**Table S1.** HER performance of the Cu<sub>0.075</sub>Co<sub>0.0925</sub>P/CP in this work, in comparison with other non-noble metal based catalysts in 0.5 M H<sub>2</sub>SO<sub>4</sub> from recent publications.

( $\eta$ : overpotential)

| Catalysts                                                  | $\eta$ (mV) at<br>10 mA cm <sup>-2</sup> | Tafel slope<br>mV dec <sup>-1</sup> | Reference                                             |
|------------------------------------------------------------|------------------------------------------|-------------------------------------|-------------------------------------------------------|
| CoP/CC                                                     | 67                                       | 51                                  | J. Am. Chem. Soc. <b>2014</b> , <i>136</i> , 7587.    |
| CoP/CNT                                                    | 122                                      | 54                                  | Angew. Chem. Int. Ed. <b>2014</b> , <i>53</i> , 6710. |
| CoP/Ti                                                     | ~75                                      | 50                                  | Angew. Chem. Int. Ed. <b>2014</b> , <i>53</i> , 5427. |
| CoPS NWs                                                   | 61                                       | 48                                  | Nat. Mater. <b>2015</b> , <i>14</i> , 1245.           |
| Co <sub>2</sub> P NPs                                      | 95                                       | 45                                  | Chem. Mater. <b>2015</b> , <i>27</i> , 3769.          |
| CoNiP@NF                                                   | 60                                       | 39                                  | J. Mater. Chem. A <b>2016</b> , <i>4</i> , 10195.     |
| np-(Co <sub>0.52</sub> Fe <sub>0.48</sub> ) <sub>2</sub> P | 64                                       | 45                                  | Energy Environ. Sci. <b>2016</b> , <i>9</i> , 2257.   |
| Ni <sub>0.62</sub> Co <sub>0.38</sub> P                    | 166                                      | 72                                  | Adv. Funct. Mater. <b>2016</b> , <i>26</i> , 7644.    |
| NiCo <sub>2</sub> P <sub>x</sub> /CF                       | 104                                      | 59.6                                | Adv. Mater. <b>2017</b> , <i>29</i> , 1605502.        |
| Mn-Co-P/Ti                                                 | 49                                       | 55                                  | ACS Catal. <b>2017</b> , <i>7</i> , 98.               |
| Ce-CoP NWs/Ti                                              | 54                                       | 54                                  | Nano Energy <b>2017</b> , <i>38</i> , 290.            |
| CoP@BCN-1                                                  | 87                                       | 46                                  | Adv. Energy Mater. <b>2017</b> , <i>7</i> , 1601671.  |
| CoP/NCNHP                                                  | 140                                      | 53                                  | J. Am. Chem. Soc. <b>2018</b> , <i>140</i> , 2610.    |
| PANI/CoP HNWs-CFs                                          | 57                                       | 34.5                                | J. Am. Chem. Soc. <b>2018</b> , <i>140</i> , 5118.    |
| Ni-CoP/HPFs                                                | 144                                      | 52                                  | Nano Energy <b>2019</b> , <i>56</i> , 411.            |
| Co-P@PC-750                                                | 72                                       | 49                                  | Small <b>2019</b> , 1900550.                          |
| Er-doped CoP                                               | 52                                       | 32                                  | J. Mater. Chem. A <b>2019</b> , <i>7</i> , 5769.      |
| N-Co <sub>2</sub> P/CC                                     | 27                                       | 45                                  | ACS Catal. <b>2019</b> , <i>9</i> , 3744.             |
| CoP/Co-MOF                                                 | 27                                       | 43                                  | Angew. Chem. Int. Ed. <b>2019</b> , <i>58</i> , 4679. |
| CoP/NiCoP/NC                                               | 60                                       | 58                                  | Adv. Funct. Mater. <b>2019</b> , <i>29</i> , 1807976. |
| Cu <sub>0.075</sub> Co <sub>0.0925</sub> P/CP              | 47                                       | 47.2                                | This work                                             |

**Table S2.** HER performance of the Cu<sub>0.075</sub>Co<sub>0.0925</sub>P/CP in this work, in comparison with other non-noble metal based catalysts in 1.0 M KOH from recent publications.

| Catalysts                                                  | $\eta$ (mV) at<br>10 mA cm <sup>-2</sup> | Tafel slope<br>mV dec <sup>-1</sup> | Reference                                             |
|------------------------------------------------------------|------------------------------------------|-------------------------------------|-------------------------------------------------------|
| CoP/CC                                                     | 209                                      | 129                                 | J. Am. Chem. Soc. <b>2014</b> , <i>136</i> , 7587.    |
| Co-P film                                                  | 94                                       | 42                                  | Angew. Chem. Int. Ed. <b>2015</b> , <i>54</i> , 6251. |
| CoP NS/C                                                   | 111                                      | 70.9                                | Green Chem. <b>2016</b> , <i>18</i> , 2287.           |
| CoNiP@NF                                                   | 155                                      | 113                                 | J. Mater. Chem. A <b>2016</b> , <i>4</i> , 10195.     |
| np-(Co <sub>0.52</sub> Fe <sub>0.48</sub> ) <sub>2</sub> P | 79                                       | 40                                  | Energy Environ. Sci. <b>2016</b> , <i>9</i> , 2257.   |
| Ni <sub>0.51</sub> Co <sub>0.49</sub> P film               | 82                                       | 43                                  | Adv. Funct. Mater. <b>2016</b> , <i>26</i> , 7644.    |
| CoP@NC                                                     | 129                                      | 58                                  | ACS Catal. <b>2017</b> , <i>7</i> , 3824.             |
| Mn-Co-P/Ti                                                 | 76                                       | 52                                  | ACS Catal. <b>2017</b> , <i>7</i> , 98.               |
| Ce-CoP NWs/Ti                                              | 92                                       | 63.5                                | Nano Energy <b>2017</b> , <i>38</i> , 290.            |
| Fe-CoP/Ti                                                  | 78                                       | 75                                  | Adv. Mater. <b>2017</b> , <i>29</i> , 1602441.        |
| CoMoP@C                                                    | 81                                       | 55.5                                | Energy Environ. Sci. <b>2017</b> , <i>10</i> , 788.   |
| Ni-Co-P HNBs                                               | 107                                      | 46                                  | Energy Environ. Sci. <b>2018</b> , <i>11</i> , 872.   |
| Co <sub>0.93</sub> Ni <sub>0.07</sub> P <sub>3</sub> /CC   | 87                                       | 60.7                                | ACS Energy Lett. <b>2018</b> , <i>3</i> , 1744.       |
| CoP/NCNHP                                                  | 115                                      | 66                                  | J. Am. Chem. Soc. <b>2018</b> , <i>140</i> , 2610.    |
| CoP@3D MXene                                               | 168                                      | 58                                  | ACS Nano <b>2018</b> , <i>12</i> , 8017.              |
| Ni-CoP/HPFs                                                | 92                                       | 71                                  | Nano Energy <b>2019</b> , <i>56</i> , 411.            |
| Co-P@PC-750                                                | 76                                       | 52                                  | Small <b>2019</b> , 1900550.                          |
| Er-doped CoP                                               | 66                                       | 61                                  | J. Mater. Chem. A <b>2019</b> , <i>7</i> , 5769.      |
| N-Co <sub>2</sub> P/CC                                     | 34                                       | 51                                  | ACS Catal. <b>2019</b> , <i>9</i> , 3744.             |
| CoP/Co-MOF                                                 | 34                                       | 56                                  | Angew. Chem. Int. Ed. <b>2019</b> , <i>58</i> , 4679. |
| CoP/NiCoP/NC                                               | 75                                       | 64                                  | Adv. Funct. Mater. <b>2019</b> , <i>29</i> , 1807976. |
| Cu <sub>0.075</sub> Co <sub>0.0925</sub> P/CP              | 70                                       | 55.1                                | This work                                             |

**Table S3.** HER performance of the Cu<sub>0.075</sub>Co<sub>0.0925</sub>P/CP in this work, in comparison with other non-noble metal based catalysts in 1.0 M PBS from recent publications.

| Catalysts                                        | $\eta$ (mV) at<br>10 mA cm <sup>-2</sup> | Tafel slope<br>mV dec <sup>-1</sup> | Reference                                                  |
|--------------------------------------------------|------------------------------------------|-------------------------------------|------------------------------------------------------------|
| CoP/CC                                           | 106                                      | 93                                  | J. Am. Chem. Soc. <b>2014</b> , <i>136</i> , 7587.         |
| CoP/Ti                                           | 149                                      | 111                                 | Chem. Mater. <b>2014</b> , <i>26</i> , 4326.               |
| CoNi <sub>4</sub> P <sub>2</sub>                 | 430                                      | NA                                  | Energy Environ. Sci. <b>2014</b> , <i>7</i> , 329.         |
| CoP-MNA/NF                                       | ~180*                                    | 189                                 | Adv. Funct. Mater. <b>2015</b> , <i>25</i> , 7337.         |
| NiCoP/rGO                                        | 124                                      | 91                                  | Adv. Funct. Mater <b>2016</b> , <i>26</i> , 6785.          |
| CoP NW/Hb                                        | 121                                      | 106                                 | Nano Research <b>2017</b> , <i>10</i> , 1010.              |
| Mn-Co-P/Ti                                       | 86                                       | 82                                  | ACS Catal. <b>2017</b> , <i>7</i> , 98.                    |
| CoP@BCN-1                                        | 122                                      | 59                                  | Adv. Energy Mater. <b>2017</b> , <i>7</i> , 1601671.       |
| PdP <sub>2</sub> @CB                             | 84.6                                     | 72.3                                | Angew. Chem. Int. Ed. <b>2018</b> , <i>57</i> , 1.         |
| Ni <sub>2</sub> P@NPCNFs                         | 185.3                                    | 230.3                               | Angew. Chem. Int. Ed. <b>2018</b> , <i>57</i> , 1963.      |
| Ni <sub>0.1</sub> Co <sub>0.9</sub> P/CFP        | 125                                      | 103                                 | Angew. Chem. Int. Ed. <b>2018</b> , <i>57</i> , 15445.     |
| CoP@NPMG                                         | 126                                      | 62                                  | Nanoscale, <b>2018</b> , <i>10</i> , 2603.                 |
| Co-P@PC-750                                      | 85                                       | 58                                  | Small <b>2019</b> , 1900550.                               |
| np-Co <sub>9</sub> S <sub>4</sub> P <sub>4</sub> | 87                                       | 52                                  | ACS Appl. Mater. Interfaces <b>2019</b> , <i>11</i> , 3880 |
| N-Co <sub>2</sub> P/CC                           | 42                                       | 68                                  | ACS Catal. <b>2019</b> , <i>9</i> , 3744.                  |
| CoP/Co-MOF                                       | 49                                       | 63                                  | Angew. Chem. Int. Ed. <b>2019</b> , <i>58</i> , 4679.      |
| CoP/NiCoP/NC                                     | 123                                      | 78                                  | Adv. Funct. Mater. <b>2019</b> , <i>29</i> , 1807976.      |
| Cu <sub>0.075</sub> Co <sub>0.0925</sub> P/CP    | 120                                      | 97.5                                | This work                                                  |

\*: In 0.5 M PBS.

**Table S4.** OER performance of the Cu<sub>0.075</sub>Co<sub>0.0925</sub>P/CP in this work, in comparison with other non-noble metal based catalysts in 1.0 M KOH from recent publications.

| Catalysts                                                  | $\eta$ (mV) at<br>10 mA cm <sup>-2</sup> | Tafel slope<br>mV dec <sup>-1</sup> | Reference                                        |
|------------------------------------------------------------|------------------------------------------|-------------------------------------|--------------------------------------------------|
| CoP-MNA/NF                                                 | 290                                      | 65                                  | Adv. Funct. Mater. <b>2015</b> , 25, 7337.       |
| Co-P film                                                  | 345                                      | 47                                  | Angew. Chem. Int. Ed. <b>2015</b> , 54, 6251.    |
| CoP NR/C                                                   | 320                                      | 71                                  | ACS Catal. <b>2015</b> , 5, 6874.                |
| np-(Co <sub>0.52</sub> Fe <sub>0.48</sub> ) <sub>2</sub> P | 270                                      | 30                                  | Energy Environ. Sci. <b>2016</b> , 9, 2257.      |
| NiCoP/NF                                                   | 280                                      | 87                                  | Nano Lett. <b>2016</b> , 16, 7718.               |
| CoMnP nanoparticles                                        | 330                                      | 61                                  | J. Am. Chem. Soc. <b>2016</b> , 138, 4006.       |
| CoP/rGO                                                    | 340                                      | 66                                  | Chem. Sci. <b>2016</b> , 7, 1690.                |
| CoP NS/C                                                   | 277                                      | 85.6                                | Green Chem. <b>2016</b> , 18, 2287.              |
| NiCoP/Ti                                                   | 310                                      | 52                                  | Adv. Mater. Interfaces <b>2016</b> , 3, 1500454. |
| NiCoP/C                                                    | 330                                      | 96                                  | Angew. Chem. Int. Ed. <b>2017</b> , 56, 3897.    |
| Fe-CoP/Ti                                                  | 230                                      | 67                                  | Adv. Mater. <b>2017</b> , 29, 1602441.           |
| Ni-Co-P HNBS                                               | 270                                      | 76                                  | Energy Environ. Sci. <b>2018</b> , 11, 872.      |
| Mo-CoOOH/CC                                                | 305                                      | 56                                  | Nano Energy <b>2018</b> , 48, 73.                |
| S:CoP@NG                                                   | 260                                      | 108                                 | Nano Energy <b>2018</b> , 53, 286.               |
| CoP/NCNHP                                                  | 310                                      | 70                                  | J. Am. Chem. Soc. <b>2018</b> , 140, 2610.       |
| CoP@3D MXene                                               | 290                                      | 51                                  | ACS Nano <b>2018</b> , 12, 8017.                 |
| S:Co <sub>2</sub> P@CC                                     | 290                                      | 82                                  | Chem. Mater. <b>2018</b> , 30, 8861              |
| CoP@NPMG                                                   | 276                                      | 54                                  | Nanoscale, <b>2018</b> , 10, 2603.               |
| Co-P@PC-750                                                | 283                                      | 53                                  | Small <b>2019</b> , 1900550                      |
| Er-doped CoP                                               | 256                                      | 70                                  | J. Mater. Chem. A <b>2019</b> , 7, 5769          |
| Cr-FeNiP/NCN                                               | 240                                      | 72.36                               | Adv. Mater. <b>2019</b> , 1900178                |
| Cu <sub>0.075</sub> Co <sub>0.0925</sub> P/CP              | 221                                      | 70.4                                | This work                                        |

**Table S5.** Summary of recent reported representative of bifunctional non-noble metal based catalysts for overall water-splitting in 1.0 M KOH.

| Catalysts                                                  | Potential (V) at<br>10 mA cm <sup>-2</sup> | Reference                                        |
|------------------------------------------------------------|--------------------------------------------|--------------------------------------------------|
| Co-P film                                                  | 1.65                                       | Angew. Chem. Int. Ed. <b>2015</b> , 54, 6251.    |
| CoP-MNA                                                    | 1.62                                       | Adv. Funct. Mater. <b>2015</b> , 25, 7337.       |
| CoP NR                                                     | 1.587                                      | ACS Catal. <b>2015</b> , 5, 6874.                |
| np-(Co <sub>0.52</sub> Fe <sub>0.48</sub> ) <sub>2</sub> P | 1.53                                       | Energy Environ. Sci. <b>2016</b> , 9, 2257.      |
| NiCoP/Ti                                                   | 1.64                                       | Adv. Mater. Interfaces <b>2016</b> , 3, 1500454. |
| CoP/GO                                                     | 1.7                                        | Chem. Sci. <b>2016</b> , 7, 1690.                |
| NiCoP/NF                                                   | 1.58                                       | Nano Lett. <b>2016</b> , 16, 7718.               |
| Fe-CoP/Ti                                                  | 1.60                                       | Adv. Mater. <b>2017</b> , 29, 1602441.           |
| Co <sub>4</sub> Ni <sub>1</sub> P NTs                      | 1.59                                       | Adv. Funct. Mater. <b>2017</b> , 27, 1703455.    |
| Ni-Co-P HNBS                                               | 1.62                                       | Energy Environ. Sci. <b>2018</b> , 11, 872.      |
| Mo-CoP/CC                                                  | 1.56                                       | Nano Energy <b>2018</b> , 48, 73.                |
| S:CoP@NF                                                   | 1.617                                      | Nano Energy <b>2018</b> , 53, 286.               |
| CoP/NCNHP                                                  | 1.64                                       | J. Am. Chem. Soc. <b>2018</b> , 140, 2610.       |
| CoP@NPMG                                                   | 1.58                                       | Nanoscale, <b>2018</b> , 10, 2603.               |
| CoP@3D MXene                                               | 1.58                                       | ACS Nano <b>2018</b> , 12, 8017.                 |
| Co-P@PC-750                                                | 1.60                                       | Small <b>2019</b> , 1900550.                     |
| Er-doped CoP                                               | 1.58                                       | J. Mater. Chem. A <b>2019</b> , 7, 5769.         |
| Cr-FeNiP/NCN                                               | 1.5                                        | Adv. Mater. <b>2019</b> , 1900178.               |
| Cu <sub>0.075</sub> Co <sub>0.0925</sub> P/CP              | 1.55                                       | This work                                        |

## References

- 1 J. Tian, Q. Liu, N. Cheng, A. M. Asiri and X. Sun, *Angew. Chem. Int. Ed.*, 2014, **53**, 9577-9581.
- 2 P. Hohenberg and W. Kohn, *Phys. Rev.*, 1964, **136**, B864-B871.
- 3 W. Kohn and L. J. Sham, *Phys. Rev.*, 1965, **140**, A1133-A1138.
- 4 G. Kresse and J. Hafner, *Phys. Rev. B*, 1993, **47**, 558-561.
- 5 P. E. Blöchl, *Phys. Rev. B*, 1994, **50**, 17953-17979.
- 6 G. Kresse and J. Furthmüller, *Phys. Rev. B*, 1996, **54**, 11169-11186.
- 7 J. P. Perdew, K. Burke and M. Ernzerhof, *Phys. Rev. Lett.*, 1996, **77**, 3865-3868.
- 8 I. C. Man, H.-Y. Su, F. Calle-Vallejo, H. A. Hansen, J. I. Martínez, N. G. Inoglu, J. Kitchin, T. F. Jaramillo, J. K. Nørskov and J. Rossmeisl, *ChemCatChem*, 2011, **3**, 1159-1165.
- 9 M. García-Mota, M. Bajdich, V. Viswanathan, A. Vojvodic, A. T. Bell and J. K. Nørskov, *J. Phys. Chem. C*, 2012, **116**, 21077-21082.
- 10 C. C. L. McCrory, S. Jung, I. M. Ferrer, S. M. Chatman, J. C. Peters and T. F. Jaramillo, *J. Am. Chem. Soc.*, 2015, **137**, 4347-4357.
- 11 Y. Pan, K. Sun, Y. Lin, X. Cao, Y. Cheng, S. Liu, L. Zeng, W.-C. Cheong, D. Zhao, K. Wu, Z. Liu, Y. Liu, D. Wang, Q. Peng, C. Chen and Y. Li, *Nano Energy*, 2019, **56**, 411-419.
